# Supplementary material
Source: Springer Nature journal article supplement (https://www.springermedizin.de/resource/supplementary/12887_2013_953_MOESM3_ESM.pdf/9476876)

**Figure 3: National trend for stunting compared to separate trends boys and girls**

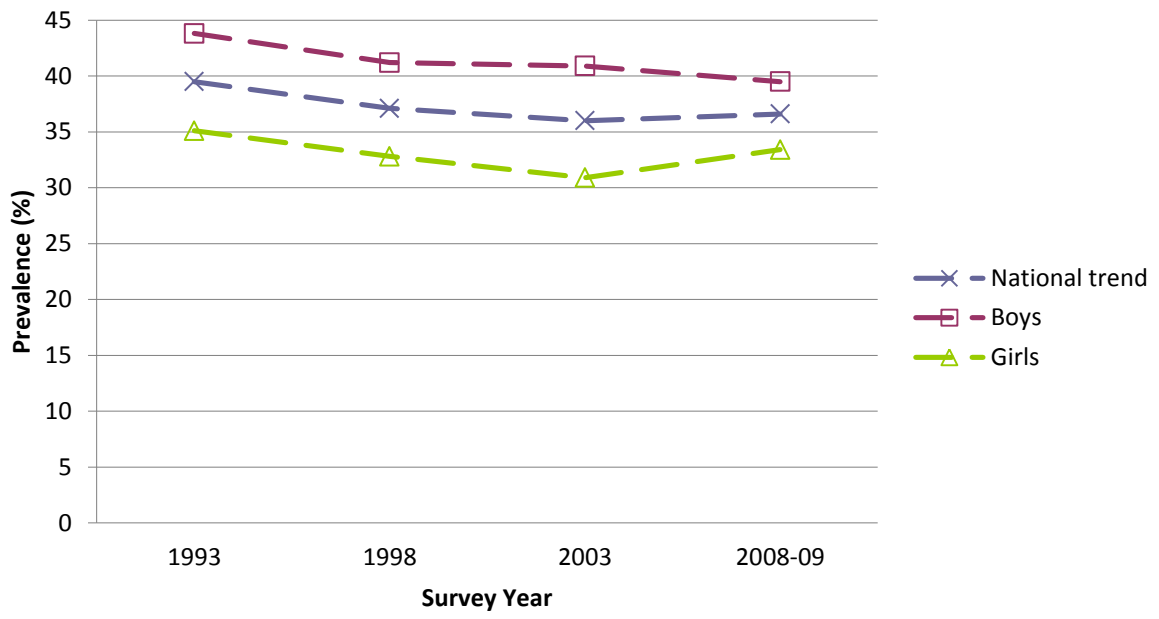

Supplement: MOESM3 [file 9476876]
